# Supplementary material for: Functional analysis of thyroid hormone receptor beta in Xenopus tropicalis founders using CRISPR-Cas
Source: PubMed Central journal article supplement (PMC5829506; doi:10.1242/bio.030338), 2018-01-15
Supplement: biolopen-7-030338-s1.pdf [file biolopen-7-030338-s1.pdf]

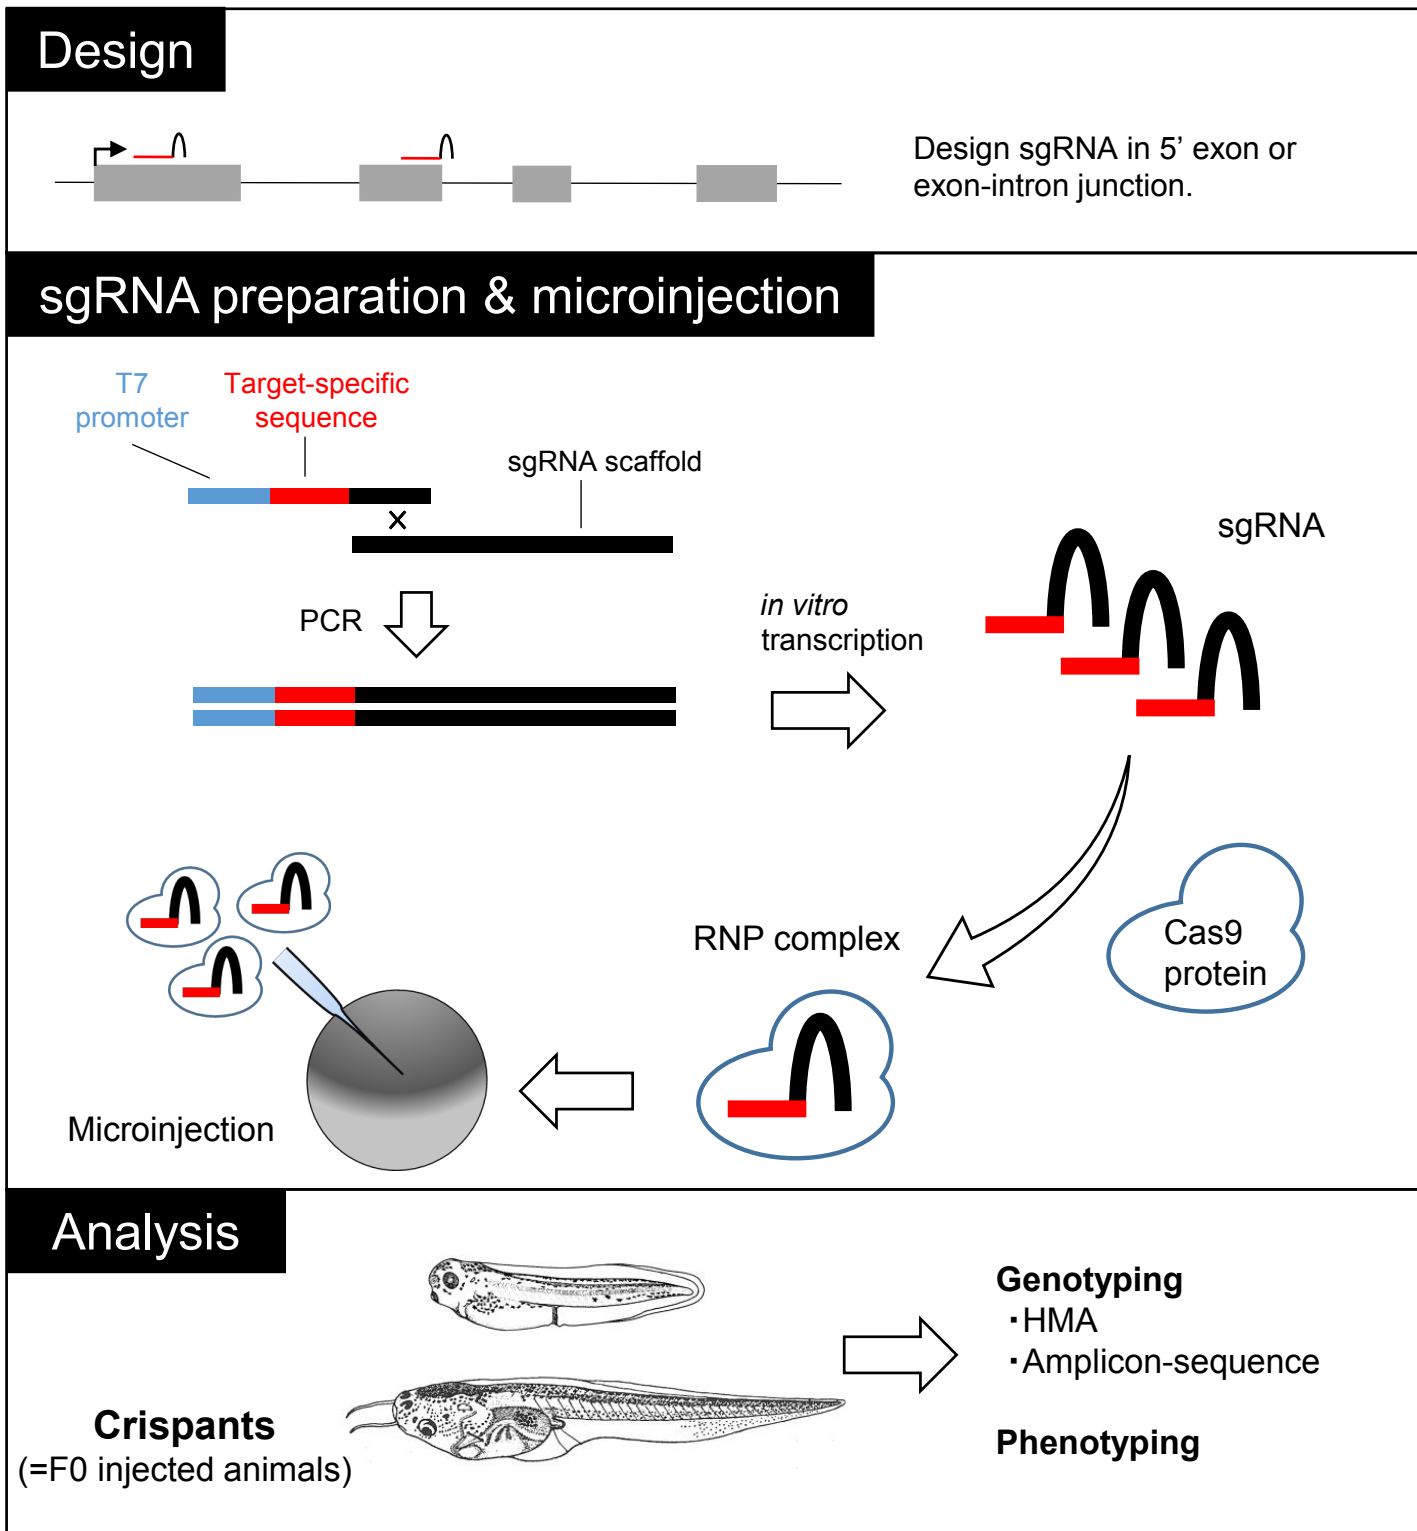

**Fig. S1: A workflow for sgRNA/Cas9 RNP injection into *Xenopus tropicalis***

We established an efficient and rapid gene disruption workflow for the loss-of-function analysis using the CRISPR-Cas system in *X. tropicalis* founders. First, we design one or more sgRNAs targeting 5' exons or exon-intron junctions to induce frameshift mutations and/or splicing errors. Next, sgRNAs are synthesized *in vitro* by T7 RNA polymerase using templates produced by PCR and assembled with Cas9 protein to form an RNP complex. sgRNA/Cas9 RNP is injected into one-cell-stage fertilized eggs, and the developing embryos (crispants) are genotyped by HMA and amplicon-sequencing followed by phenotyping.

**A**

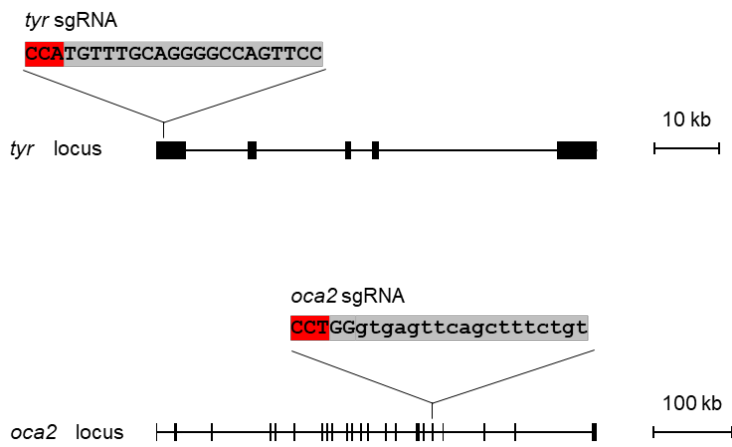

**B**

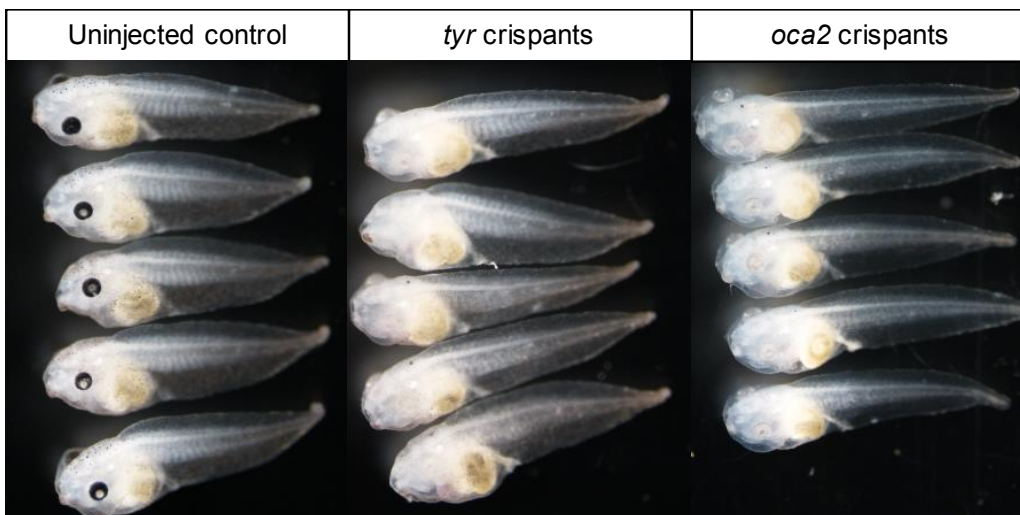

**C**

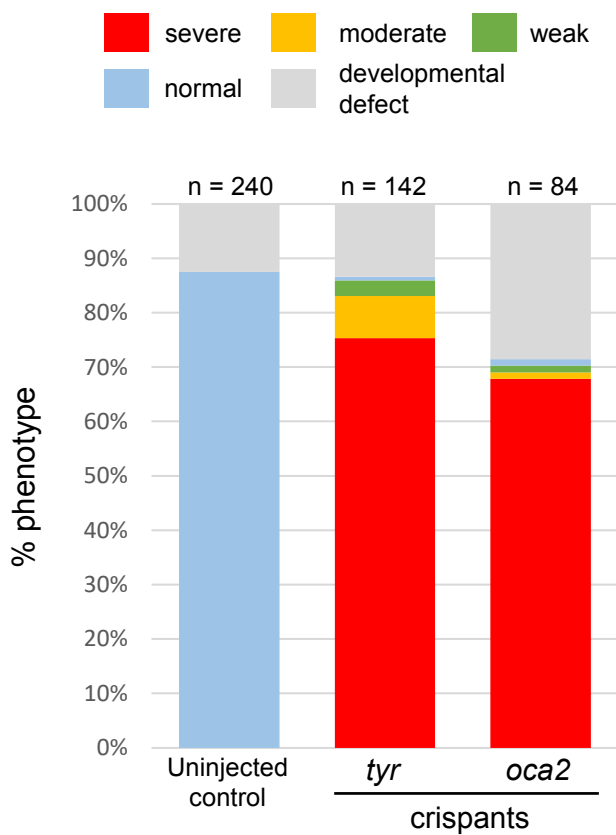

**D**

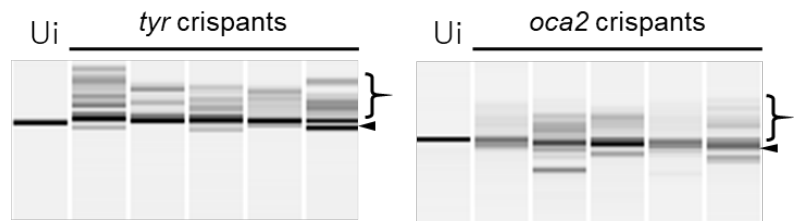

**E**

| target gene<br>(total crispant samples) | <i>tyr</i><br>(n = 10) | <i>oca2</i><br>(n = 5) |
|-----------------------------------------|------------------------|------------------------|
| wild-type reads (%)                     | 0<br>(0 %)             | 0<br>(0 %)             |
| mutant reads (%)                        | 24936<br>(100 %)       | 13309<br>(100 %)       |
| <b>total reads</b>                      | <b>24936</b>           | <b>13309</b>           |

**Fig. S2: Phenotyping and genotyping of embryos with disrupted melanin synthesis-related genes**

(A) Schematic illustration of the gene structure and sgRNA targeting sequences of *tyrosinase* (*tyr*) and *oculocutaneous albinism 2* (*oca2*) genes. Coding regions are shown as black boxes. Sequences highlighted in red and gray denote protospacer adjacent motif (PAM) and the 20 bp target sequence of sgRNA, respectively. Capital letters: exon; small letters: intron. (B) Representative severe phenotypes of *tyr* and *oca2* crispants. (C) Phenotypes were classified into four groups: severe, near complete loss of pigmentation in retinal pigmented epithelium; moderate, more than half of pigmentation lost; weak, less than half of pigmentation lost; and normal, no alteration in pigmentation (Shigeta et al., 2016; Sakane et al., 2017). (D) Genotyping of crispants with HMA. Target regions were amplified with 35 cycles of PCR. Genomic PCR products were analyzed using microchip electrophoresis. Arrowheads and brackets indicate homoduplex and heteroduplex bands, respectively. Ui: uninjected control embryos. (E) The numbers and percentages of wild-type and mutant allele reads in each crispant. Reads obtained from next-generation sequencing were classified into each gene and individual by their specific barcode sequences. According to sequence data from uninjected control embryos, the rates of artificial backgrounds such as PCR or sequencing errors were calculated, and we discounted reads below these artificial background rates. Significant reads in ten *tyr* and five *oca2* crispants were counted as total reads and somatic mutation rates were calculated.

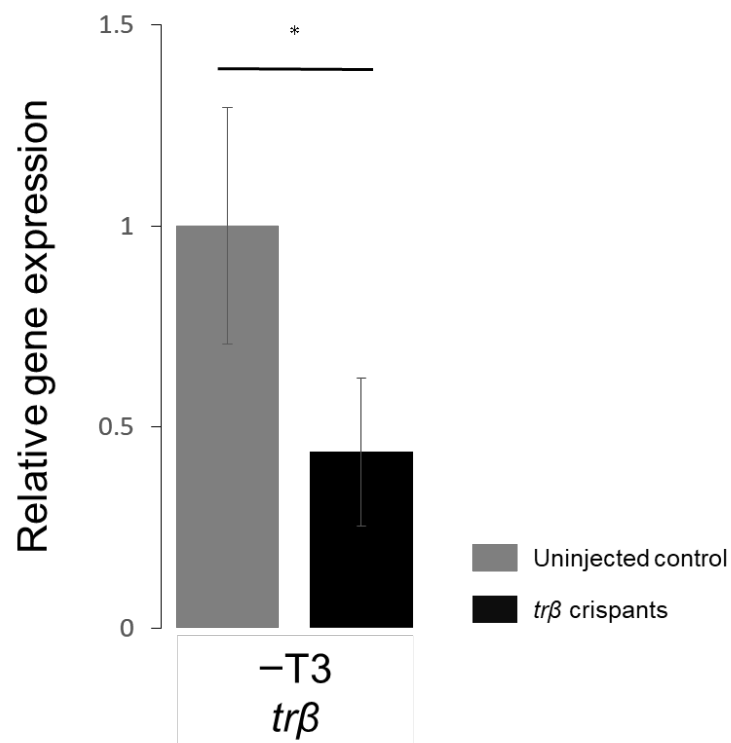

**Fig. S3: mRNA expression of *trβ* in the absent of T3**

The result of *trβ* expression in control and crispants without T3. The scale of Y axis is enlarged in Fig. 4. \*,  $P < 0.005$ ; Welch's *t*-test.

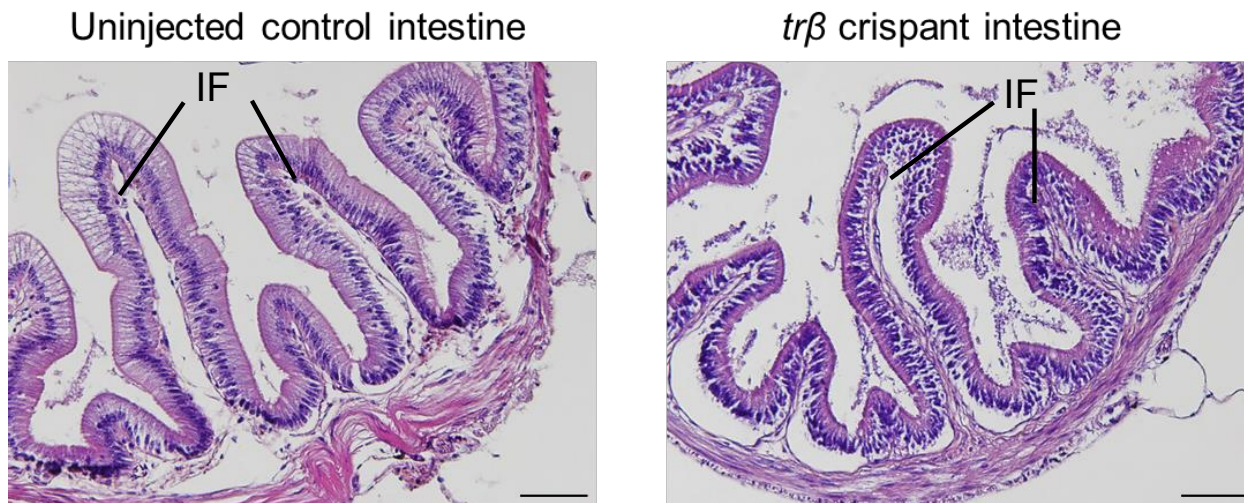

**Fig. S4: Histological analysis of intestine**

Intestines of uninjected control froglets and *trβ* crispants about one month after metamorphosis were processed for histology and stained with hematoxylin and eosin. Intestinal folds (IF), which develop only in the adult organ, were observed in both control froglets and crispants. Bar: 50  $\mu$  m.

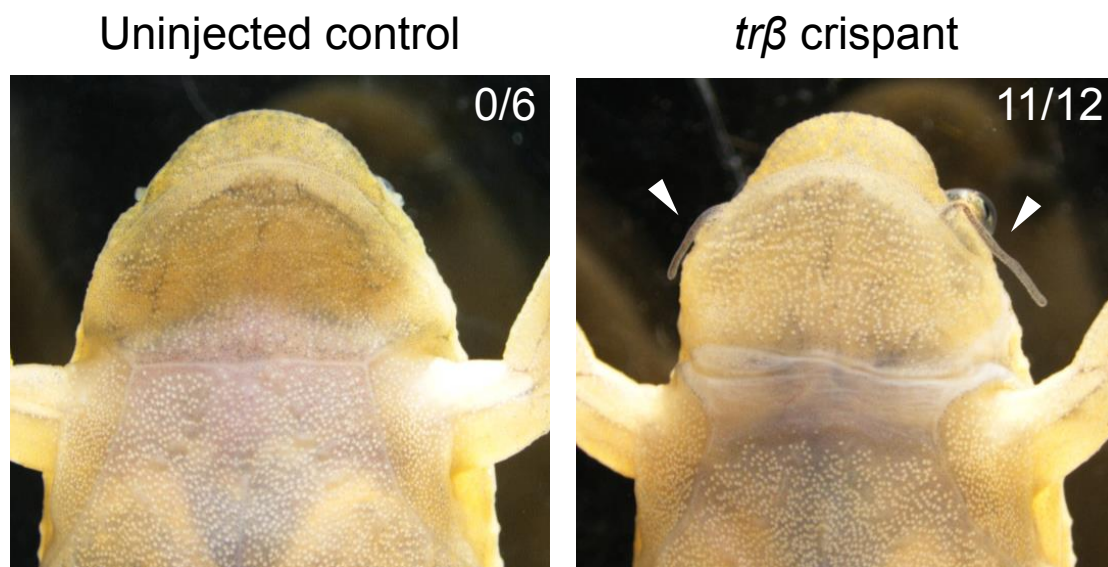

**Fig. S5: Tentacle resorption was delayed in *trβ* crispants**

About one week after metamorphosis, tentacles remained near the mouth of *trβ* crispants (arrowheads). Images are representative of six uninjected control froglets and eleven *trβ* crispants. The number of froglets with remaining tentacle(s) is given in the images.

**Supplementary information table****Table S1: Sequences of sgRNA targeting sites.**

| sgRNA name   | Target sites (5' to 3')         |
|--------------|---------------------------------|
| <i>tyr</i>   | <u>CCAT</u> GTTTGCAGGGGCCAGTTCC |
| <i>oca2</i>  | <u>CCT</u> GGGTGAGTTCAGCTTTCTGT |
| <i>trβ-1</i> | GATGAGCTATGCGTGGTGTG <u>TGG</u> |
| <i>trβ-2</i> | AGGGCTGCAAGGTAACAGAT <u>TGG</u> |

PAM sequence is underlined.

**Table S2: Oligonucleotide information in this study.**

Primers used for HMA.

| Target gene | Forward primer sequence (5' to 3') | Reverse primer sequence (5' to 3') |
|-------------|------------------------------------|------------------------------------|
| <i>tyr</i>  | AAGCCTGCACATGTGATTGTGCTT<br>G      | GAGGACCCATCTCCAGACCACAC<br>AG      |
| <i>oca2</i> | TGTTTGTCTGTCTTGGGCTTTGTC<br>A      | GGGTTACAGCACTGATATGACT<br>ATGG     |
| <i>trβ</i>  | TTTCTTTCTTTGCTTTCCTTATCA           | ACTGCTGTAGCGCAGGGTTC               |

Oligonucleotides used for PCR assembly for sgRNA template.

| sgRNA name   | Forward oligonucleotide sequence (5' to 3')                      |
|--------------|------------------------------------------------------------------|
| <i>oca2</i>  | TAATACGACTCACTATAGGAGAAAGCTGAACTCACCCGTTTTAGAGCT<br>AGAAATAGCAAG |
| <i>trβ-1</i> | TAATACGACTCACTATAGGTGAGCTATGCGTGGTGTGGTTTTAGAGCT<br>AGAAATAGCAAG |
| <i>trβ-2</i> | TAATACGACTCACTATAGGGGCTGCAAGGTAACAGATGTTTTAGAGC<br>TAGAAATAGCAAG |

|                                                |                                                                                     |
|------------------------------------------------|-------------------------------------------------------------------------------------|
| Reverse oligonucleotide<br>sequence (5' to 3') | AAAAGCACCGACTCGGTGCCACTTTTTCAAGTTGATAACGG<br>ACTAGCCTTATTTAACTTGCTATTTCTAGCTCTAAAAC |
|------------------------------------------------|-------------------------------------------------------------------------------------|



Oligonucleotides used for constructing sgRNA vector.

| sgRNA name | Sequence (5' to 3') |                           |
|------------|---------------------|---------------------------|
| <i>tyr</i> | Sense               | TATAGGAACTGGCCCCTGCAAACAG |
|            | Antisense           | AAAAGTGTTCAGGGGCCAGTTCC   |

Primers for sgRNA *in vitro* transcription template.

| Primer name | Sequence (5' to 3') |
|-------------|---------------------|
| IVT-gRNA-F  | GAATTCTAATACGACTCAC |
| IVT-gRNA-R  | AAAAGCACCGACTCGG    |

Primers for the amplicon sequence.

The overhang adapter and barcode sequences are added to the locus-specific primer. Barcode sequences are indicated by small letters.

| Primer name                   | Sequence (5' to 3')                                              |
|-------------------------------|------------------------------------------------------------------|
| <i>tyr</i> -Wt-ampliconseq1-F | TCGTCGGCAGCGTCAGATGTGTATAAGAGACAGttaaAGCAGCATG<br>GAAAGGAACATG   |
| <i>tyr</i> -Wt-ampliconseq1-R | GTCTCGTGGGCTCGGAGATGTGTATAAGAGACAGttaaCAGAGCTG<br>GTCAGGACAACATC |
| <i>tyr</i> -Wt-ampliconseq2-F | TCGTCGGCAGCGTCAGATGTGTATAAGAGACAGaaccgAGCAGCAT<br>GGAAAGGAACATG  |
| <i>tyr</i> -Wt-ampliconseq2-R | GTCTCGTGGGCTCGGAGATGTGTATAAGAGACAGatcgCAGAGCTG<br>GTCAGGACAACATC |
| <i>tyr</i> -Wt-ampliconseq3-F | TCGTCGGCAGCGTCAGATGTGTATAAGAGACAGagcgAGCAGCAT<br>GGAAAGGAACATG   |
| <i>tyr</i> -Wt-ampliconseq3-R | GTCTCGTGGGCTCGGAGATGTGTATAAGAGACAGaccgCAGAGCT<br>GGTCAGGACAACATC |
| <i>tyr</i> -Wt-ampliconseq4-F | TCGTCGGCAGCGTCAGATGTGTATAAGAGACAGacgAGCAGCATG<br>GAAAGGAACATG    |
| <i>tyr</i> -Wt-ampliconseq4-R | GTCTCGTGGGCTCGGAGATGTGTATAAGAGACAGgtagCAGAGCTG<br>GTCAGGACAACATC |

|                            |                                                                  |
|----------------------------|------------------------------------------------------------------|
| tyr-Wt-<br>ampliconseq5-F  | TCGTCGGCAGCGTCAGATGTGTATAAGAGACAGcacgAGCAGCAT<br>GGAAAGGAACATG   |
| tyr-Wt-<br>ampliconseq5-R  | GTCTCGTGGGCTCGGAGATGTGTATAAGAGACAGtatgCAGAGCTG<br>GTCAGGACAACATC |
| oca2-Wt-<br>ampliconseq1-F | TCGTCGGCAGCGTCAGATGTGTATAAGAGACAGcaatATGTTTGTC<br>TGTCTTGGGCTTT  |
| oca2-Wt-<br>ampliconseq1-R | GTCTCGTGGGCTCGGAGATGTGTATAAGAGACAGctatAAGGGGTT<br>ACAGCACTGATATG |
| oca2-Wt-<br>ampliconseq2-F | TCGTCGGCAGCGTCAGATGTGTATAAGAGACAGcacacATGTTTGTC<br>TGTCTTGGGCTTT |
| oca2-Wt-<br>ampliconseq2-R | GTCTCGTGGGCTCGGAGATGTGTATAAGAGACAGgactAAGGGGTT<br>ACAGCACTGATATG |
| oca2-Wt-<br>ampliconseq3-F | TCGTCGGCAGCGTCAGATGTGTATAAGAGACAGttacATGTTTGTCT<br>GTCTTGGGCTTT  |
| oca2-Wt-<br>ampliconseq3-R | GTCTCGTGGGCTCGGAGATGTGTATAAGAGACAGtgacAAGGGGTT<br>ACAGCACTGATATG |
| oca2-Wt-<br>ampliconseq4-F | TCGTCGGCAGCGTCAGATGTGTATAAGAGACAGaatgATGTTTGTC<br>TGTCTTGGGCTTT  |
| oca2-Wt-<br>ampliconseq4-R | GTCTCGTGGGCTCGGAGATGTGTATAAGAGACAGtgcaAAGGGGTT<br>ACAGCACTGATATG |
| oca2-Wt-<br>ampliconseq5-F | TCGTCGGCAGCGTCAGATGTGTATAAGAGACAGgtacATGTTTGTC<br>TGTCTTGGGCTTT  |
| oca2-Wt-<br>ampliconseq5-R | GTCTCGTGGGCTCGGAGATGTGTATAAGAGACAGggacAAGGGGT<br>TACAGCACTGATATG |

| Primer name               | Sequence (5' to 3')                                               |
|---------------------------|-------------------------------------------------------------------|
| tyr-Mt-<br>ampliconseq1-F | TCGTCGGCAGCGTCAGATGTGTATAAGAGACAGttaagAGCAGCATG<br>GAAAGGAACATG   |
| tyr-Mt-<br>ampliconseq1-R | GTCTCGTGGGCTCGGAGATGTGTATAAGAGACAGttaagCAGAGCTG<br>GTCAGGACAACATC |
| tyr-Mt-<br>ampliconseq2-F | TCGTCGGCAGCGTCAGATGTGTATAAGAGACAGaacgAGCAGCAT<br>GGAAAGGAACATG    |

|                        |                                                                  |
|------------------------|------------------------------------------------------------------|
| tyr-Mt-ampliconseq2-R  | GTCTCGTGGGCTCGGAGATGTGTATAAGAGACAGatcgCAGAGCTG<br>GTCAGGACAACATC |
| tyr-Mt-ampliconseq3-F  | TCGTCGGCAGCGTCAGATGTGTATAAGAGACAGagcgAGCAGCAT<br>GGAAAGGAACATG   |
| tyr-Mt-ampliconseq3-R  | GTCTCGTGGGCTCGGAGATGTGTATAAGAGACAGaccgCAGAGCT<br>GGTCAGGACAACATC |
| tyr-Mt-ampliconseq4-F  | TCGTCGGCAGCGTCAGATGTGTATAAGAGACAGacgAGCAGCATG<br>GAAAGGAACATG    |
| tyr-Mt-ampliconseq4-R  | GTCTCGTGGGCTCGGAGATGTGTATAAGAGACAGgtagCAGAGCTG<br>GTCAGGACAACATC |
| tyr-Mt-ampliconseq5-F  | TCGTCGGCAGCGTCAGATGTGTATAAGAGACAGcagAGCAGCAT<br>GGAAAGGAACATG    |
| tyr-Mt-ampliconseq5-R  | GTCTCGTGGGCTCGGAGATGTGTATAAGAGACAGtatgCAGAGCTG<br>GTCAGGACAACATC |
| tyr-Mt-ampliconseq6-F  | TCGTCGGCAGCGTCAGATGTGTATAAGAGACAGttcgAGCAGCATG<br>GAAAGGAACATG   |
| tyr-Mt-ampliconseq6-R  | GTCTCGTGGGCTCGGAGATGTGTATAAGAGACAGtccgCAGAGCTG<br>GTCAGGACAACATC |
| tyr-Mt-ampliconseq7-F  | TCGTCGGCAGCGTCAGATGTGTATAAGAGACAGtgcgAGCAGCATG<br>GAAAGGAACATG   |
| tyr-Mt-ampliconseq7-R  | GTCTCGTGGGCTCGGAGATGTGTATAAGAGACAGggttCAGAGCTG<br>GTCAGGACAACATC |
| tyr-Mt-ampliconseq8-F  | TCGTCGGCAGCGTCAGATGTGTATAAGAGACAGctcgAGCAGCATG<br>GAAAGGAACATG   |
| tyr-Mt-ampliconseq8-R  | GTCTCGTGGGCTCGGAGATGTGTATAAGAGACAGcccgCAGAGCT<br>GGTCAGGACAACATC |
| tyr-Mt-ampliconseq9-F  | TCGTCGGCAGCGTCAGATGTGTATAAGAGACAGcgcgAGCAGCAT<br>GGAAAGGAACATG   |
| tyr-Mt-ampliconseq9-R  | GTCTCGTGGGCTCGGAGATGTGTATAAGAGACAGgacgCAGAGCT<br>GGTCAGGACAACATC |
| tyr-Mt-ampliconseq10-F | TCGTCGGCAGCGTCAGATGTGTATAAGAGACAGgtcgAGCAGCATG<br>GAAAGGAACATG   |

|                            |                                                                  |
|----------------------------|------------------------------------------------------------------|
| tyr-Mt-<br>ampliconseq10-R | GTCTCGTGGGCTCGGAGATGTGTATAAGAGACAGgccgCAGAGCT<br>GGTCAGGACAACATC |
| oca2-Mt-<br>ampliconseq1-F | TCGTCGGCAGCGTCAGATGTGTATAAGAGACAGcaatATGTTTGTC<br>TGTCTTGGGCTTT  |
| oca2-Mt-<br>ampliconseq1-R | GTCTCGTGGGCTCGGAGATGTGTATAAGAGACAGctatAAGGGGTT<br>ACAGCACTGATATG |
| oca2-Mt-<br>ampliconseq2-F | TCGTCGGCAGCGTCAGATGTGTATAAGAGACAGacacATGTTTGTC<br>TGTCTTGGGCTTT  |
| oca2-Mt-<br>ampliconseq2-R | GTCTCGTGGGCTCGGAGATGTGTATAAGAGACAGgactAAGGGGTT<br>ACAGCACTGATATG |
| oca2-Mt-<br>ampliconseq3-F | TCGTCGGCAGCGTCAGATGTGTATAAGAGACAGttacATGTTTGTC<br>GTCTTGGGCTTT   |
| oca2-Mt-<br>ampliconseq3-R | GTCTCGTGGGCTCGGAGATGTGTATAAGAGACAGtgacAAGGGGTT<br>ACAGCACTGATATG |
| oca2-Mt-<br>ampliconseq4-F | TCGTCGGCAGCGTCAGATGTGTATAAGAGACAGaatgATGTTTGTC<br>TGTCTTGGGCTTT  |
| oca2-Mt-<br>ampliconseq4-R | GTCTCGTGGGCTCGGAGATGTGTATAAGAGACAGtgcaAAGGGGTT<br>ACAGCACTGATATG |
| oca2-Mt-<br>ampliconseq5-F | TCGTCGGCAGCGTCAGATGTGTATAAGAGACAGgtacATGTTTGTC<br>TGTCTTGGGCTTT  |
| oca2-Mt-<br>ampliconseq5-R | GTCTCGTGGGCTCGGAGATGTGTATAAGAGACAGggacAAGGGGT<br>TACAGCACTGATATG |

| Primer name                       | Sequence (5' to 3')                                             |
|-----------------------------------|-----------------------------------------------------------------|
| tr $\beta$ -Mt-<br>ampliconseq1-F | TCGTCGGCAGCGTCAGATGTGTATAAGAGACAGacgGGTATCAAAG<br>GGTGTCCAAAAA  |
| tr $\beta$ -Mt-<br>ampliconseq1-R | GTCTCGTGGGCTCGGAGATGTGTATAAGAGACAGgtagATTTCCAG<br>GCAGTGCCAATA  |
| tr $\beta$ -Mt-<br>ampliconseq2-F | TCGTCGGCAGCGTCAGATGTGTATAAGAGACAGcacgGGTATCAAA<br>GGGTGTCCAAAAA |
| tr $\beta$ -Mt-<br>ampliconseq2-R | GTCTCGTGGGCTCGGAGATGTGTATAAGAGACAGtatgATTTCCAGG<br>CAGTGCCAATA  |

|                                   |                                                                 |
|-----------------------------------|-----------------------------------------------------------------|
| tr $\beta$ -Mt-<br>ampliconseq3-F | TCGTCGGCAGCGTCAGATGTGTATAAGAGACAGttcgGGTATCAAA<br>GGGTGTCCAAAAA |
| tr $\beta$ -Mt-<br>ampliconseq3-R | GTCTCGTGGGCTCGGAGATGTGTATAAGAGACAGtccgATTTCCAGG<br>CAGTGCCAATA  |
| tr $\beta$ -Mt-<br>ampliconseq4-F | TCGTCGGCAGCGTCAGATGTGTATAAGAGACAGtgcgGGTATCAAA<br>GGGTGTCCAAAAA |
| tr $\beta$ -Mt-<br>ampliconseq4-R | GTCTCGTGGGCTCGGAGATGTGTATAAGAGACAGggttATTTCCAGG<br>CAGTGCCAATA  |
| tr $\beta$ -Mt-<br>ampliconseq5-F | TCGTCGGCAGCGTCAGATGTGTATAAGAGACAGctcgGGTATCAAA<br>GGGTGTCCAAAAA |
| tr $\beta$ -Mt-<br>ampliconseq5-R | GTCTCGTGGGCTCGGAGATGTGTATAAGAGACAGcccgATTTCCAG<br>GCAGTGCCAATA  |
| tr $\beta$ -Mt-<br>ampliconseq6-F | TCGTCGGCAGCGTCAGATGTGTATAAGAGACAGcgcgGGTATCAAA<br>GGGTGTCCAAAAA |
| tr $\beta$ -Mt-<br>ampliconseq6-R | GTCTCGTGGGCTCGGAGATGTGTATAAGAGACAGgacgATTTCCAG<br>GCAGTGCCAATA  |
| tr $\beta$ -Mt-<br>ampliconseq7-F | TCGTCGGCAGCGTCAGATGTGTATAAGAGACAGgtcgGGTATCAAA<br>GGGTGTCCAAAAA |
| tr $\beta$ -Mt-<br>ampliconseq7-R | GTCTCGTGGGCTCGGAGATGTGTATAAGAGACAGgccgATTTCCAG<br>GCAGTGCCAATA  |
| tr $\beta$ -Mt-<br>ampliconseq8-F | TCGTCGGCAGCGTCAGATGTGTATAAGAGACAGcaatGGTATCAAA<br>GGGTGTCCAAAAA |
| tr $\beta$ -Mt-<br>ampliconseq8-R | GTCTCGTGGGCTCGGAGATGTGTATAAGAGACAGctatATTTCCAGG<br>CAGTGCCAATA  |

## Primers used for RT-PCR.

| Target gene                 | Forward primer sequence (5' to 3') | Reverse primer sequence (5' to 3') |
|-----------------------------|------------------------------------|------------------------------------|
| <i>tr<math>\beta</math></i> | AAGAAACAAAACCTGGCCATC              | AAGCGACATTCTTGCCACT                |

## Primers used for qPCR

| Target gene | Forward primer sequence (5' to 3') | Reverse primer sequence (5' to 3') |
|-------------|------------------------------------|------------------------------------|
|             |                                    |                                    |

|              |                               |                       |
|--------------|-------------------------------|-----------------------|
| <i>rpl8</i>  | CCCTCAACCATCAGGAGAGA          | TCTTTGTACCACGCAGACGA  |
| <i>trβ</i>   | ATAATGCCAAGCAGTATGTCAGA<br>GA | CACACACCACGCATAGCTCAT |
| <i>klf9</i>  | GGTGCCTTATGCTGGGTGT           | GCGAGTCAACTCATCGGAAC  |
| <i>fra-2</i> | TCCCATCCTTACAGCCACTC          | TTCTCCTGCTCCAGCTTCTC  |
| <i>mmp13</i> | CCGAGGGTTACTTGGACAAA          | CACCGACATCCCAAAGAACT  |
| <i>fapa</i>  | ATCCTGGGGAAAAGCCTCTA          | CTGGGGCCTCTTCATATTCA  |
